# Supplementary material for: Impacts of Longer-Term Exposure to AuNPs on Two Soil Ecotoxicological Model Species
Source: MDPI journal article supplement (doi:10.3390/toxics10040153), 2022-03-22
Supplement: s1 [file s1]

# Supplementary Materials: Impacts of Longer-Term Exposure to AuNPs on Two Soil Ecotoxicological Model Species

Bruno Guimarães, Susana I. L. Gomes, Janeck J. Scott-Fordsmand and Mónica J. B. Amorim

**Table S1.** Characterization of the water suspension of gold nanoparticles (AuNPs), stabilized with polyvinylpyrrolidone (PVP) used in the experiments. DLS: dynamic light scattering; ICP-OES: inductively coupled plasma optical emission spectrometry; UV-Vis: Ultraviolet-visible spectroscopy; wt: weight; Pd: Polydispersity; kcps: count rate;  $\sigma$ : standard deviation; n/a: not available.

| Characteristics           |                                      | Technique |        |      |         |
|---------------------------|--------------------------------------|-----------|--------|------|---------|
| Complete formulation      | Gold (Au 0,54 % wt)                  |           |        |      | ICP-OES |
|                           | PVP (0,27 ± 0,5 %wt)                 |           |        |      |         |
| Dispersant medium         | Water solution; Sodium citrate: 1 mM |           |        |      | n/a     |
| Z-average (nm)            | 27.69                                |           |        |      | DLS     |
| Pd Index                  | 0.276                                |           |        |      | DLS     |
| Polydispersity (nm)       | 14.5                                 |           |        |      | DLS     |
| Polydispersity (%)        | 52.5                                 |           |        |      | DLS     |
| Derived kcps              | 127.6                                |           |        |      | DLS     |
| ξ-potential (mV)          | -14.4 ± 2.4                          |           |        |      | DLS     |
| Absorption peak (nm)      | 525                                  |           |        |      | UV-Vis  |
| Size Distribution results |                                      |           |        |      |         |
|                           | Size (d.nm)                          | % Int     | σ      | %Pd  |         |
| Peak 1                    | 37.90                                | 95.0      | 15.06  | 39.7 | DLS     |
| Peak 2                    | 3.091                                | 5.0       | 0.7931 | 25.7 | DLS     |

**Table S2.** Variation of the soil pH (0.01 M CaCl<sub>2</sub>) per test condition, species and exposure time (day 0, 28 and 56).

| Concentration (mg/kg) | <i>E. crypticus</i> |      |      | <i>F. candida</i> |      |      |
|-----------------------|---------------------|------|------|-------------------|------|------|
|                       | Day                 |      |      | Day               |      |      |
|                       | 0                   | 28   | 56   | 0                 | 28   | 56   |
| <b>0</b>              | 6.2                 | 5.72 | 5.41 | 5.25              | 5.15 | 4.69 |
| <b>dispersant</b>     | 6.21                | 5.96 | 5.37 | 5.02              | 5.05 | 4.46 |
| <b>10</b>             | 6.27                | 6.49 | 6.39 | 4.97              | 5.12 | 4.57 |
| <b>100</b>            | 6.25                | 6.38 | 6.41 | 4.94              | 5.21 | 4.78 |
| <b>200</b>            | 6.27                | 6.34 | 6.38 | 4.95              | 5.21 | 5.05 |
| <b>1000</b>           | 6.24                | 6.25 | 6.11 | 4.91              | 5.22 | 5.08 |
